# Supplementary material for: Highly selective and sensitive detection of Hg2+, Cr2O72−, and nitrobenzene/2,4-dinitrophenol in water via two fluorescent Cd-CPs
Source: Royal Society of Chemistry journal article supplement (doi:10.1039/c8nj04683b), 2018-01-01
Supplement: c8nj04683b1.pdf [file c8nj04683b1.pdf]

## **Supporting Information**

---

Highly Selective and Sensitive Detection for  $\text{Hg}^{2+}$ ,  $\text{Cr}_2\text{O}_7^{2-}$ , Nitrobenzene/2,4-dinitrophenol in Water via two Fluorescent Cd-CPs

Wang xiao, Han you, Han xingxing, Hou xiangyang,\* Wang Ji Jiang and Fu feng \*

**Department of Chemistry and Chemical Engineering, Shaanxi Key Laboratory of Chemical Reaction Engineering, Yan'an University, Yan'an, Shaanxi 716000, China**

---

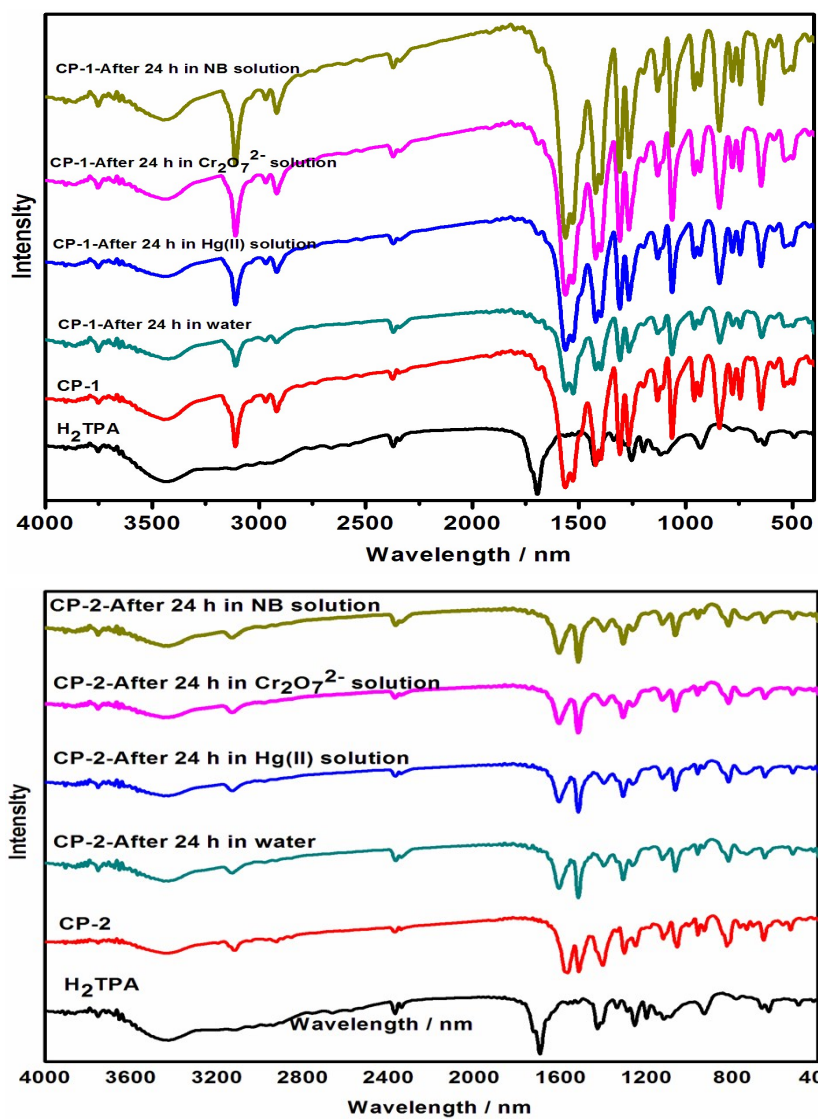

Figure S1 IR spectral for H<sub>2</sub>TPA ligand and CPs 1-2 in different conditions.

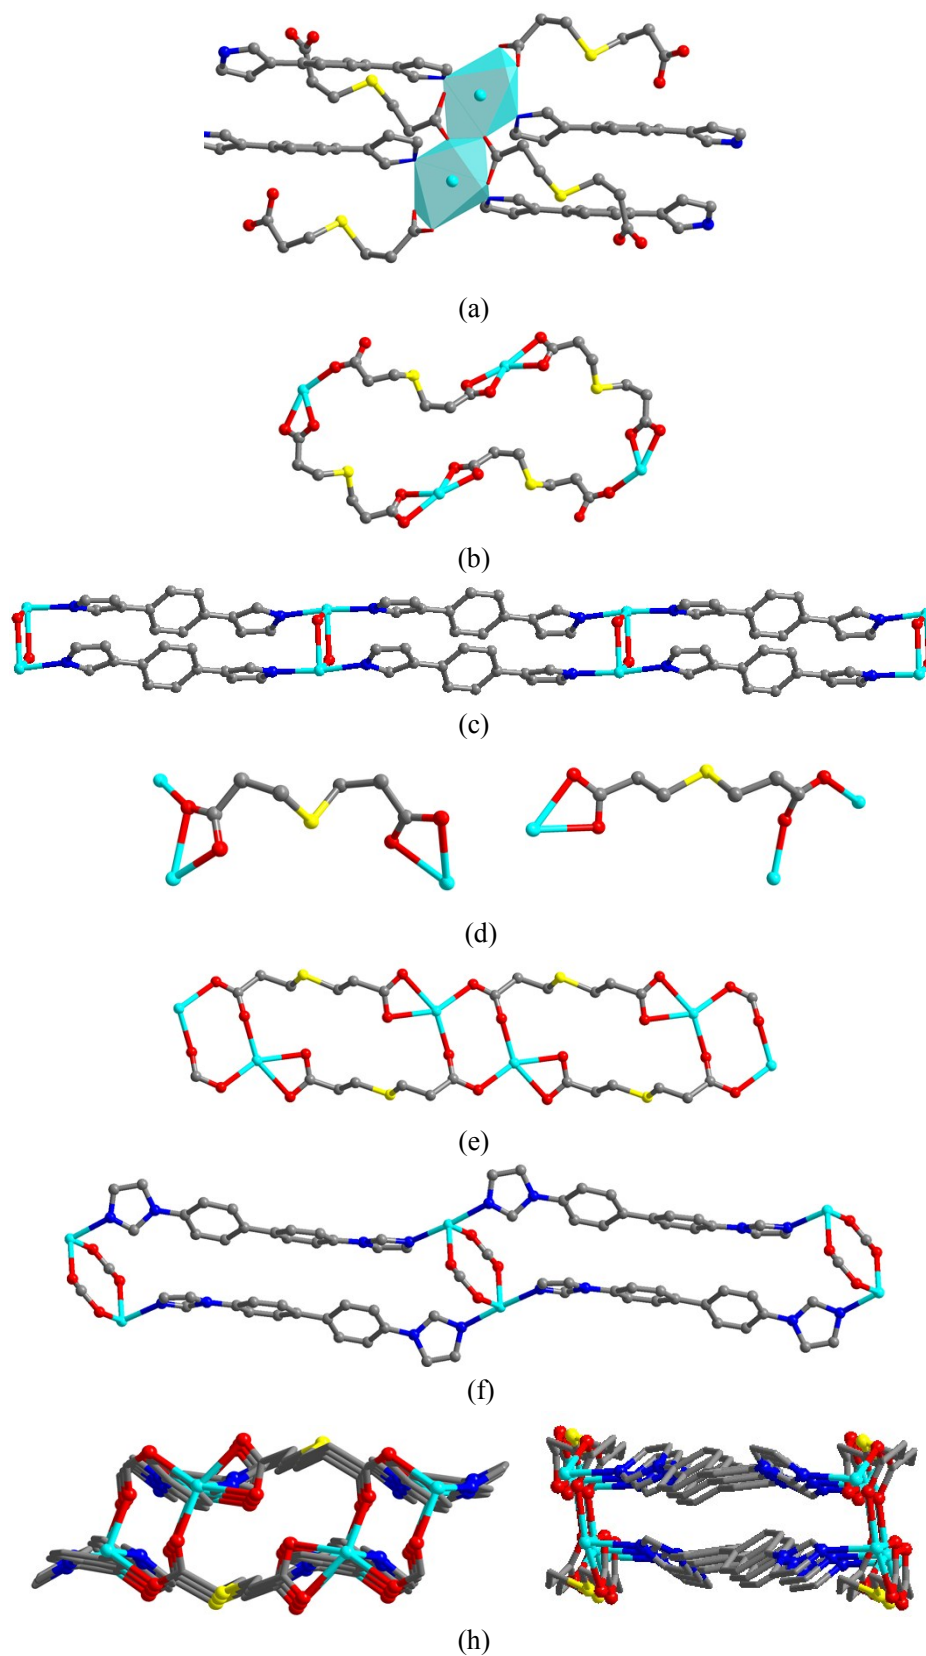

Figure S2. (a) the  $[Cd_2O_{14}N_4]$  binuclear cluster structure unit in CP 1; (b) the basic structural unit  $[Cd_4(TPA)_4]$  in the 2D planar structure of CP 1; (c) the 1D chain along the c axis in CP 1; (d) two coordination modes of TPA ligand in CP 1 and CP 2; (e) and (f) two types of 1D chains in CP 2; (h) Two types of 1D tunnel holes in CP 2.

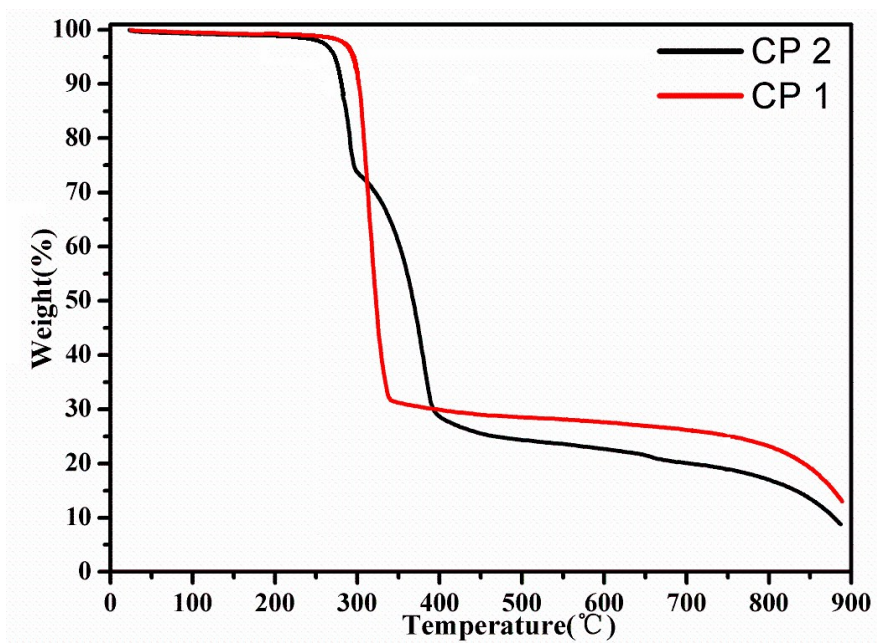

Figure S3. The thermal stabilities of CPs 1-2

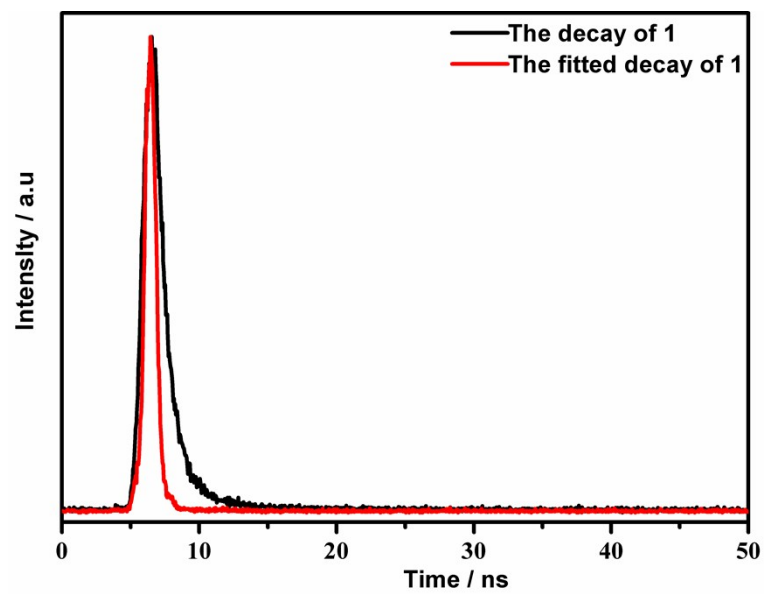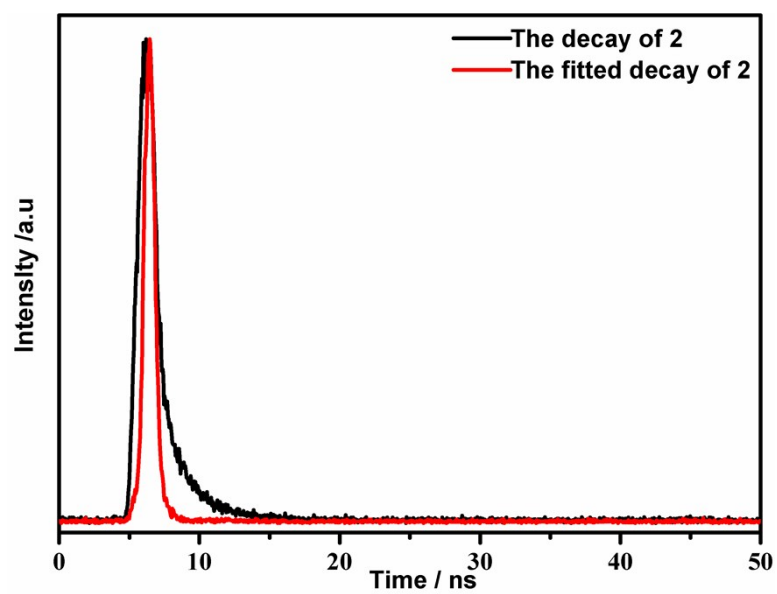

Figure S4. The fitted decay curve of CPs 1-2 at room temperature.

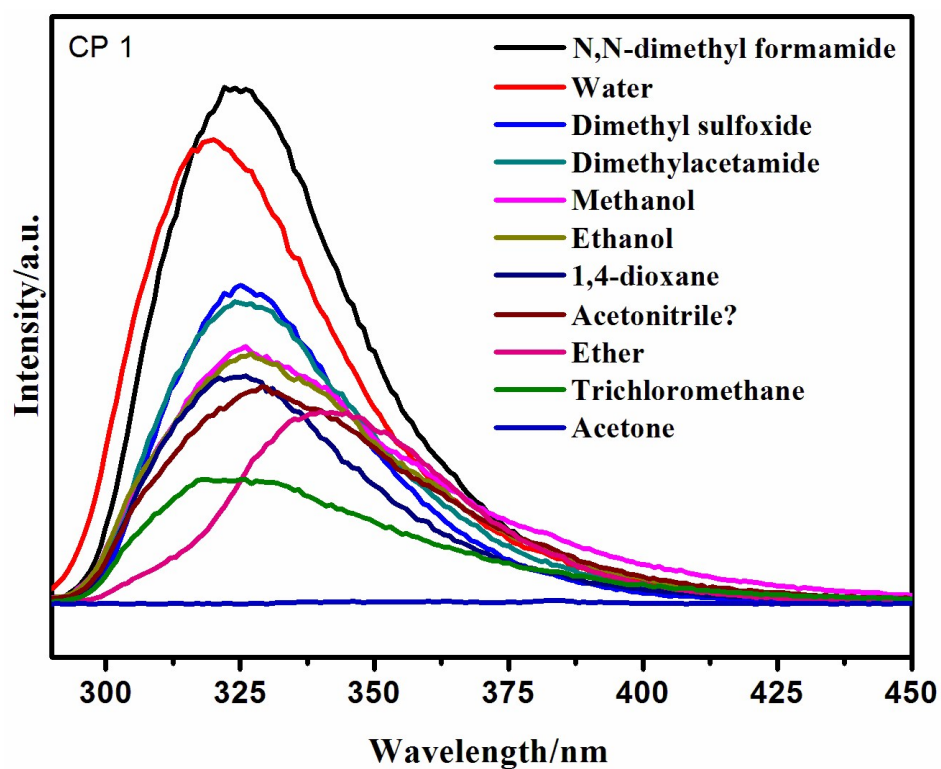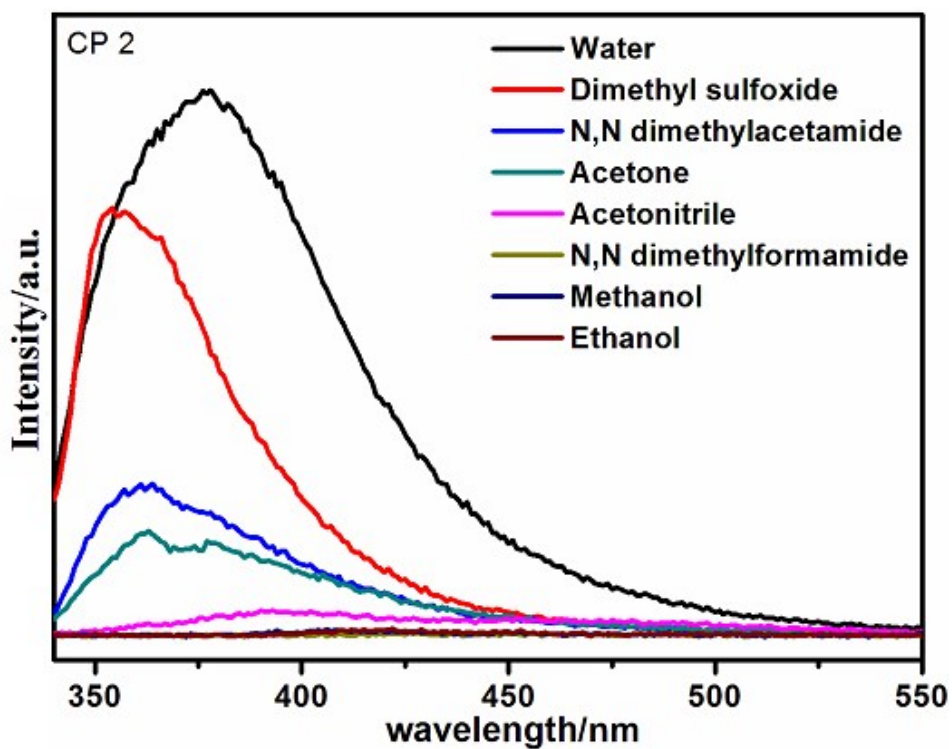

Figure S5. The fluorescence intensity of CPs 1-2 in different solvents.



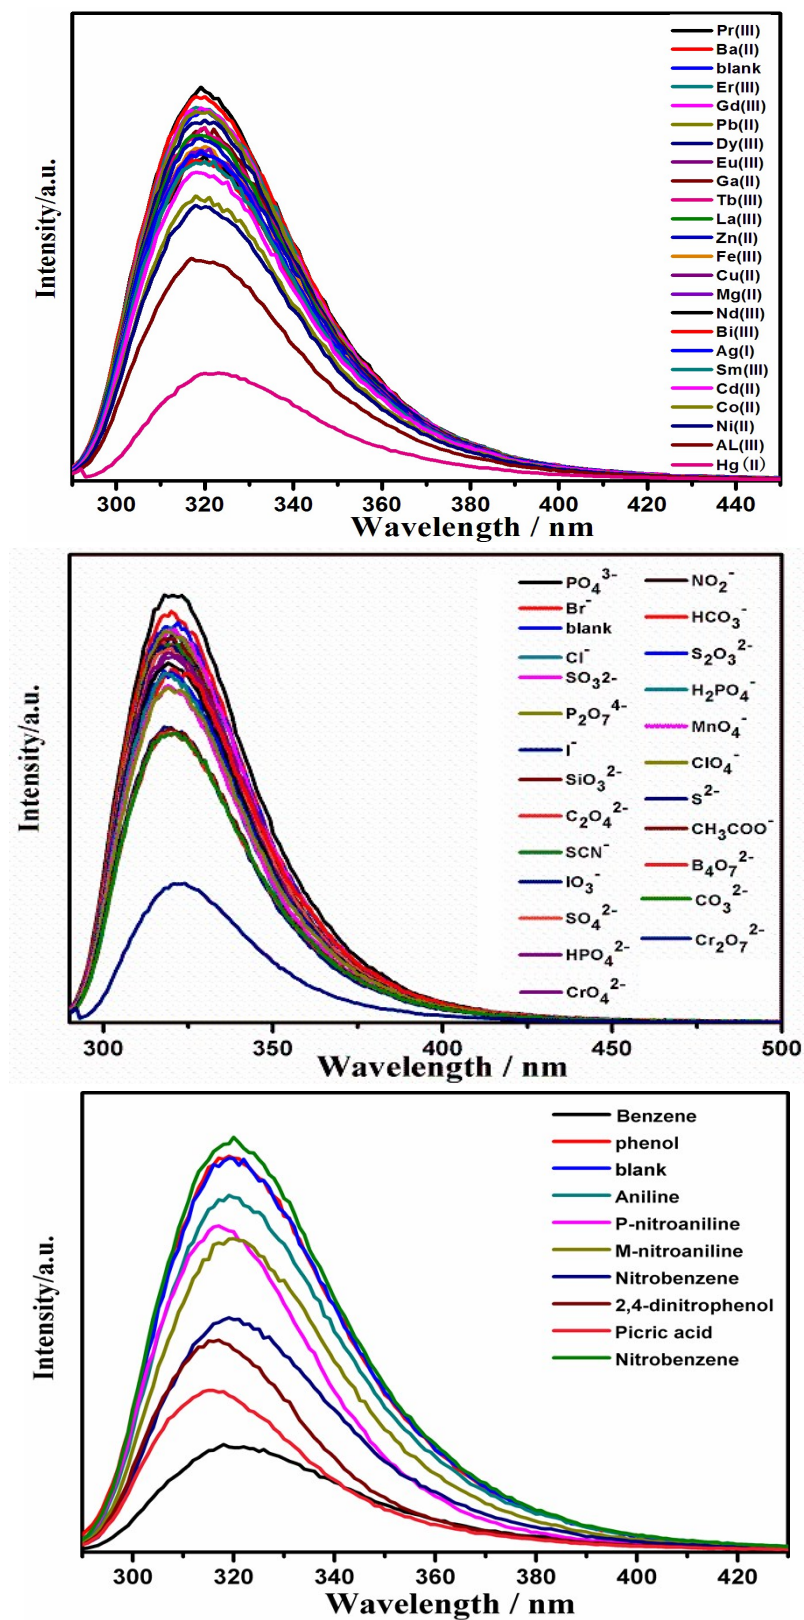

Figure S6 The luminescence curves of CP 1 with addition various metal ions and organic small molecules.

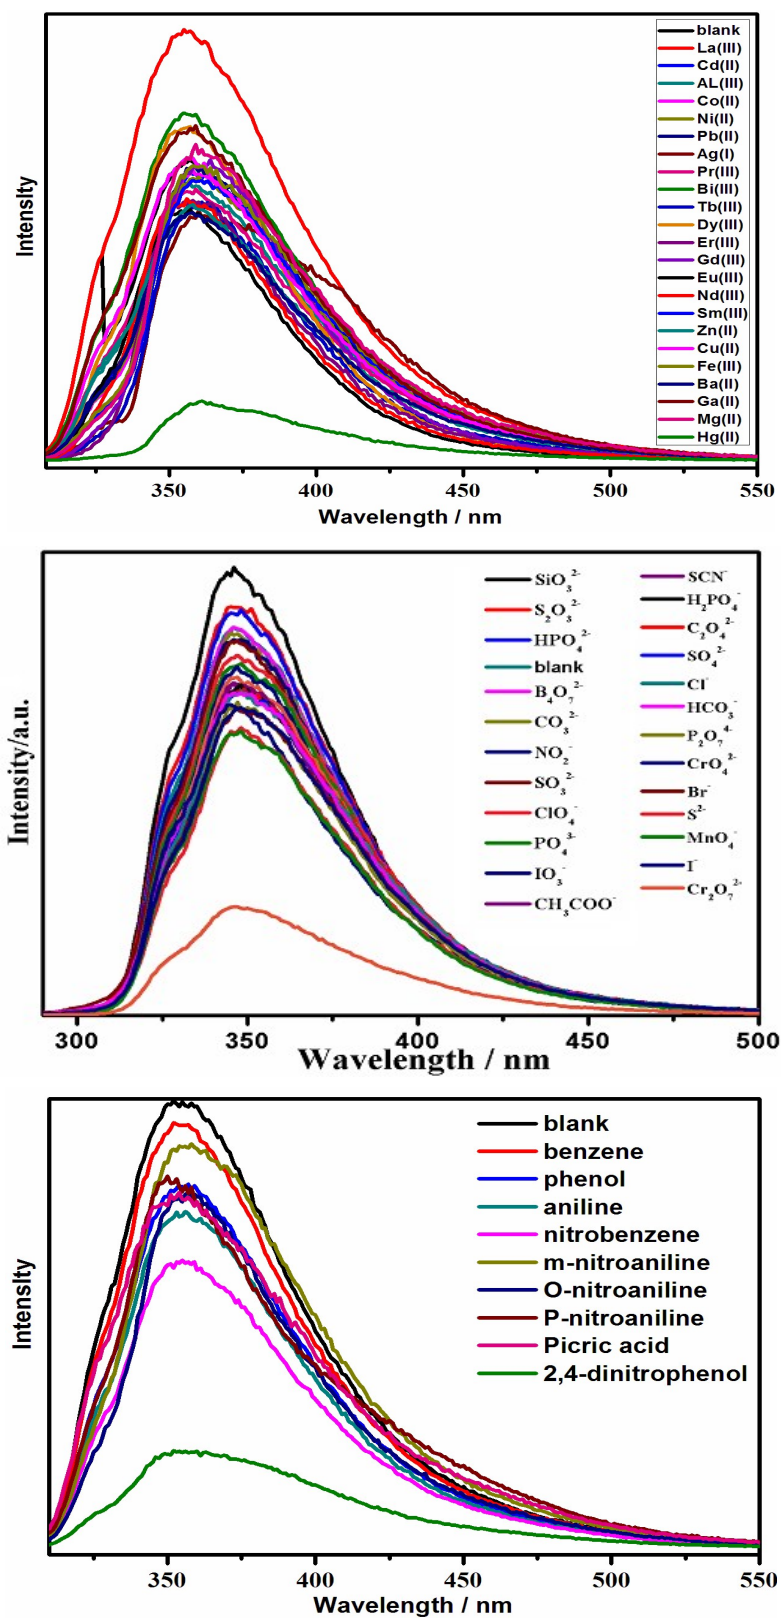

Figure S7 The luminescence curves of CP 2 with addition various metal ions and organic small molecules.



Detection Limit Calculation:

|      | FL Intensity / nm |              |             | Standard Deviation ( $\sigma$ ) |
|------|-------------------|--------------|-------------|---------------------------------|
| CP 1 | 710.539917,       | 712.2828369, | 713.2871704 | 2.4                             |
|      | 714.0880127,      | 715.6470947, | 718.7345581 |                                 |
| CP 2 | 786.2508545,      | 785.6870117, | 785.4523926 | 1.38                            |
|      | 789.2806396,      | 786.8482666, | 788.2412109 |                                 |

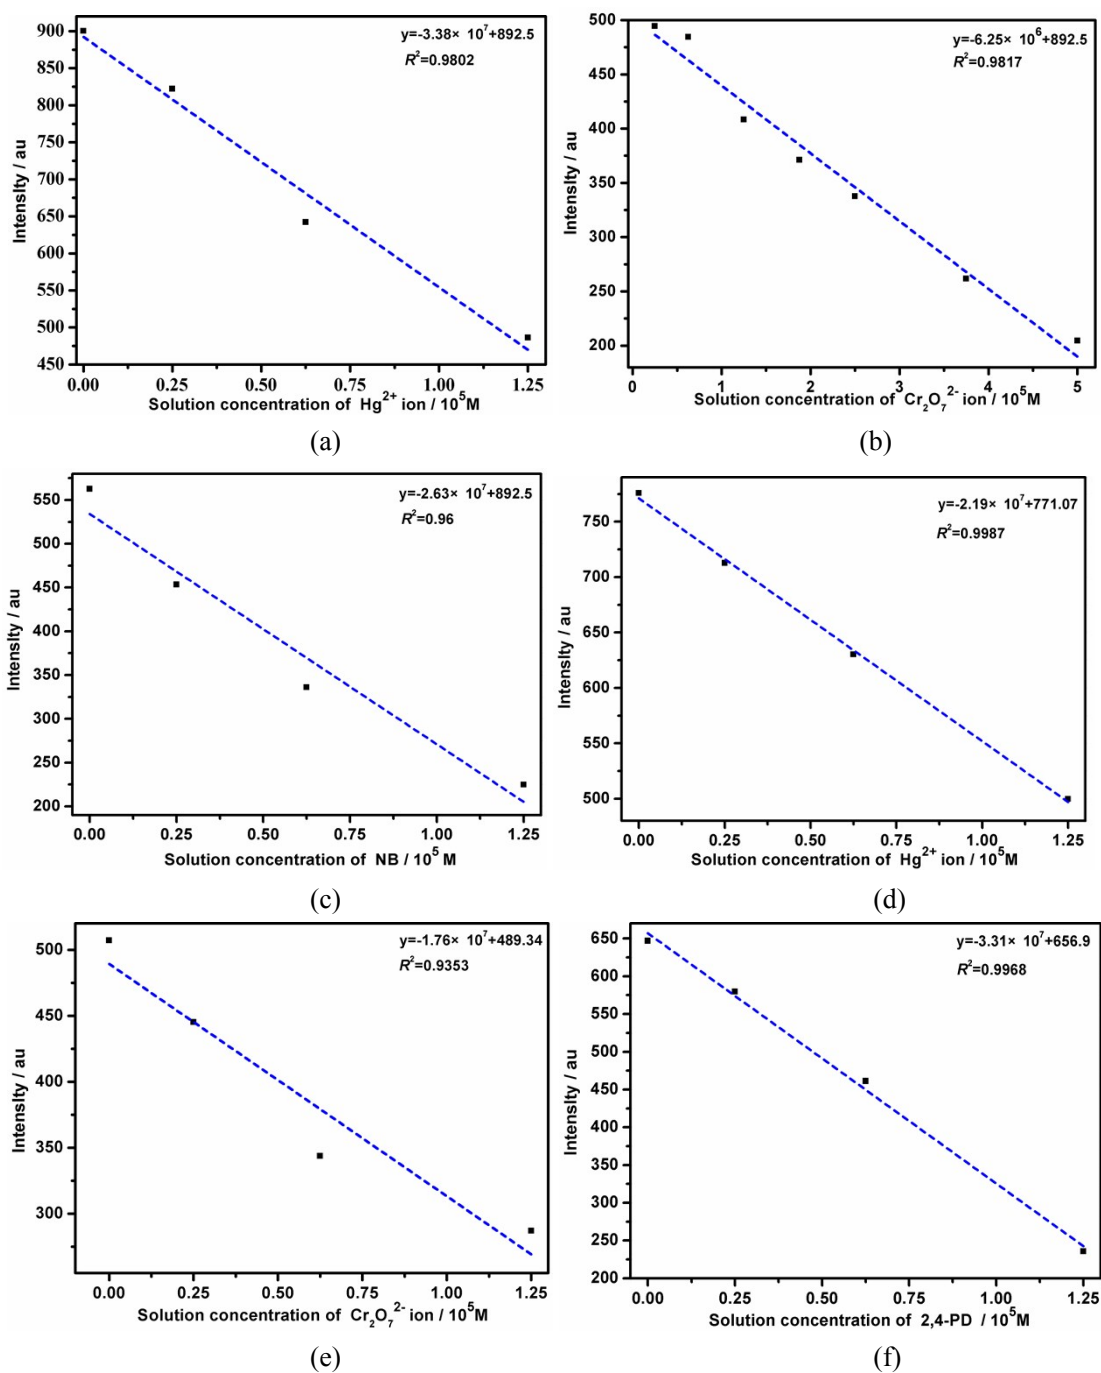

Figure S8. Linear region of fluorescence intensity of CP 1(a, b, c) and CP 2 (d, e, f) upon addition of  $\text{Hg}^{2+}$ ,  $\text{Cr}_2\text{O}_7^{2-}$ , NB, or 2,4-DP.

Table S1 Selected bond lengths (Å) and angles (°) for the CPs 1-2

| 1                                                                                  |            |                        |            |
|------------------------------------------------------------------------------------|------------|------------------------|------------|
| Cd(1)-N(1)                                                                         | 2.2835(1)  | Cd(1)-O(4)#3           | 2.3608(1)  |
| Cd(1)-O(3)#3                                                                       | 2.3836(1)  | Cd(1)-N(3)#1           | 2.2870(1)  |
| Cd(1)-O(1)                                                                         | 2.2835(1)  | Cd(1)-O(2)             | 2.3608(1)  |
| Cd(1)-O(4)#2                                                                       | 88.390(1)  | N(1) -Cd(1)-O(1)       | 98.963(1)  |
| N(1) -Cd(1)- O(4) #2                                                               | 94.071(1)  | N(1) -Cd(1)- O(4) #3   | 87.220(1)  |
| N(1) -Cd(1)- N(3)#1                                                                | 174.148(3) | O(3) #1-Cd(1)- O(4) #2 | 122.693(1) |
| O(3) #3-Cd(1)- O(4) #2                                                             | 51.434(1)  | O(3) #3-Cd(1)- O(2)    | 142.188(1) |
| Symmetry codes: #1: x, y, 1+z; #2: 1/2-x, -1/2+y, 5/2-z; #3: 1/2+x, -1/2-y, 1/2+z. |            |                        |            |
| 2                                                                                  |            |                        |            |
| Cd(1)-O1                                                                           | 2.252(14)  | Cd(1)-O(2) #1          | 2.245(13)  |
| Cd(1)-N4#3                                                                         | 2.289(17)  | Cd(1)-N(1)             | 2.314(17)  |
| Cd(1)-O3#2                                                                         | 2.398(15)  | Cd(1)-O4#2             | 2.449(14)  |
| O7#3-Cd(1)-O(1)                                                                    | 105.5(3)   | O7#3-Cd(1)-N4          | 89.8(3)    |
| O(1)-Cd(1)-N4                                                                      | 84.9(3)    | O7#3-Cd(1)-N(1)#1      | 96.3(3)    |
| O(1)-Cd(1)-N(1)#1                                                                  | 92.7(3)    | N4-Cd(1)-O3#3          | 85.4(3)    |
| N4-Cd(1)-O4#3                                                                      | 87.4(3)    | O3#3-Cd(1)-O4#3        | 53.8(2)    |
| Symmetry codes: #1: #1: 2-x, 1-y, -z; #2: -1+x, 1+y, -z; #3: 2+x, -1+y, -1+z.      |            |                        |            |
